# Supplementary material
Source: PubMed Central journal article supplement (PMC4545965)
Supplement: NIHMS706747-supplement-01.pdf [file NIHMS706747-supplement-01.pdf]

**Supplementary Table 1.** Individual BAV patient characteristics.

| Patient | Sex | Age | BAV Classification* | Aortic Valve Function |                      | Location and Aortic Diameter at Tissue Collection Site |                      |            |                      |
|---------|-----|-----|---------------------|-----------------------|----------------------|--------------------------------------------------------|----------------------|------------|----------------------|
|         |     |     |                     | Aortic Stenosis       | Aortic Regurgitation | Elevated WSS                                           | Diameter (elev. WSS) | Normal WSS | Diameter (norm. WSS) |
| 1       | M   | 47  | Type 1, RL          | Moderate-severe       | Mild                 | Z3 GC                                                  | 4.3 cm               | Z3 LC      | 4.3 cm               |
| 2       | M   | 37  | Type 1, RL          | Mild                  | Moderate-severe      | Z2 P                                                   | 4.4 cm               | Z2 A       | 4.4 cm               |
| 3       | M   | 55  | Type 0, lateral     | Moderate-severe       | None                 | Z2 P                                                   | 4.8 cm               | Z2 A       | 4.8 cm               |
| 4       | M   | 20  | Type 1, RL          | None                  | Moderate-severe      | Z2 GC                                                  | 3.6 cm               | Z2 LC      | 3.6 cm               |
| 5       | M   | 38  | Type 1, RN          | Moderate-severe       | None                 | Z3 GC                                                  | 3.9 cm               | Z2 P       | 4.1 cm               |
| 6       | M   | 60  | Type 1, RL          | Moderate-severe       | Mild                 | Z2 GC                                                  | 4.3 cm               | Z2 A       | 4.3 cm               |
| 7       | M   | 82  | Type 0, lateral     | Moderate-severe       | None                 | Z2 GC                                                  | 4.7 cm               | Z2 A       | 4.7 cm               |
| 8       | M   | 68  | Type 1, RL          | Moderate-severe       | Moderate-severe      | Z1 P                                                   | 4.2 cm               | Z1 A       | 4.2 cm               |
| 9       | M   | 29  | Type 1, RL          | None                  | Moderate-severe      | Z2 GC                                                  | 6.3 cm               | Z2 A       | 6.3 cm               |
| 10      | M   | 45  | Type 2, RL / RN     | Moderate-severe       | Moderate-severe      | Z3 GC                                                  | 4.1 cm               | Z3 LC      | 4.1 cm               |
| 11      | M   | 53  | Type 2, RL / RN     | Moderate-severe       | Moderate-severe      | Z3 GC                                                  | 4.5 cm               | Z3 P       | 4.5 cm               |
| 12      | M   | 65  | Type 1, RL          | Moderate-severe       | None                 | Z2 GC                                                  | 5.0 cm               | Z2 A       | 5.0 cm               |
| 13      | M   | 28  | Type 1, RL          | None                  | Moderate-severe      | Z2 LC                                                  | 5.2 cm               | Z2 A       | 5.2 cm               |
| 14      | F   | 41  | Type 2, RL / RN     | Moderate-severe       | Moderate-severe      | Z2 GC                                                  | 5.0 cm               | Z2 A       | 5.0 cm               |
| 15      | M   | 47  | Type 1, RL          | None                  | Moderate-severe      | Z1 GC                                                  | 4.5 cm               | Z2 A       | 4.0 cm               |
| 16      | M   | 57  | Type 1, RL          | Moderate-severe       | Mild                 | Z2 GC                                                  | 4.6 cm               | Z2 A       | 4.6 cm               |
| 17      | M   | 52  | Type 1, RL          | None                  | Moderate-severe      | Z2 GC                                                  | 4.8 cm               | Z2 LC      | 4.8 cm               |
| 18      | F   | 46  | Type 2, RL / RN     | Moderate-severe       | Moderate-severe      | Z2 GC                                                  | 4.6 cm               | Z2 A       | 4.6 cm               |
| 19      | M   | 51  | Type 1, RL          | Moderate-severe       | Moderate-severe      | Z2 P                                                   | 4.7 cm               | Z2 A       | 4.7 cm               |
| 20      | M   | 43  | Type 2, RL / RN     | Moderate-severe       | None                 | Z3 P                                                   | 4.0 cm               | Z2 A       | 6.0 cm               |

\* Sievers' BAV classification. Abbreviations: WSS = wall shear stress; RN = right coronary-non-coronary cusp fusion; RL = right-left coronary cusp fusion; Zones 1, 2 and 3 (Z1, Z2 and Z3, respectively) correspond to tissue collection zones proximal, adjacent and distal to the right pulmonary artery, respectively. Circumferential locations of tissue collection are indicated from the greater curvature (GC), lesser curvature (LC), anterior (A) or posterior (P) walls.
